# Supplementary material
Source: PubMed Central journal article supplement (PMC5460706)
Supplement: CJN.07010716SupplementaryData.pdf [file CJN.07010716SupplementaryData.pdf]

*Supplemental material is neither peer-reviewed nor thoroughly edited by CJASN. The authors alone are responsible for the accuracy and presentation of the material.*

## **Supplementary Material**

# **Comparison between Different Measures of Body Fat with Kidney Function Decline and Incident CKD**

Magdalena Madero,\* Ronit Katz,<sup>†</sup> Rachel Murphy,<sup>‡</sup> Anne Newman,<sup>§</sup> Kushang Patel,<sup>||</sup> Joachim Ix,<sup>¶</sup> Carmen Peralta,\*\* Suzanne Satterfield,<sup>††a</sup> Linda Fried,<sup>‡‡</sup> Michael Shlipak,\*\* and Mark Sarnak<sup>|||</sup>

\*Division of Nephrology, National Heart Institute, Mexico City, Mexico; <sup>†</sup>Department of Biostatistics, Washington State University, Pullman, Washington; <sup>‡</sup>Laboratory of Epidemiology and Population Science, National Institute on Aging, Bethesda, Maryland; <sup>§</sup>Department of Epidemiology, University of Pittsburgh, Pittsburgh, Pennsylvania; <sup>||</sup>Department of Anesthesiology and Pain Medicine, University of Washington, Seattle, Washington; <sup>¶</sup>Division of Nephrology-Hypertension, Department of Medicine, University of California, San Diego, California; Departments of \*\*Medicine and <sup>§§</sup>Epidemiology and Biostatistics, University of California San Francisco School of Medicine, San Diego, California; <sup>††</sup>Department of Preventative Health, College of Medicine, University of Tennessee Health Science Center, Memphis, Tennessee; <sup>‡‡</sup>Division of Renal-Electrolyte, Veterans Affairs, Pittsburgh Healthcare Center, Pittsburgh, Pennsylvania; and <sup>|||</sup>Division of Nephrology, Tufts Medical Center, Boston, Massachusetts

<sup>a</sup>Deceased.

*Supplemental material is neither peer-reviewed nor thoroughly edited by CJASN. The authors alone are responsible for the accuracy and presentation of the material.*

## **Supplementary Material**

**Table 1. Interactions between adiposity measures with race and sex**

| <b>Adiposity measure</b> | <b>P-value for interaction</b> |             |
|--------------------------|--------------------------------|-------------|
|                          | <b>Sex</b>                     | <b>Race</b> |
| SAT                      | 0.4                            | 0.6         |
| VAT                      | 0.7                            | 1.0         |
| IMAT                     | 0.9                            | 0.6         |
| WC                       | 0.8                            | 0.2         |
| BMI                      | 0.5                            | 0.5         |
| WHR                      | 0.4                            | 0.4         |

**Table 2. Association of measures of adiposity with kidney function decline using multiple predictors in the same model**

|                                               | N    | $\Delta$ eGFR_CysC>30% | Unadjusted     | Model 1*       | Model 2**      |
|-----------------------------------------------|------|------------------------|----------------|----------------|----------------|
| VAT, SAT and IMAT in the same model           |      |                        | OR (95% CI)    | OR (95% CI)    | OR (95% CI)    |
| <b>Subcutaneous fat</b>                       | 2489 | 434                    | 1.0 (0.9, 1.2) | 1.1 (0.9, 1.2) | 1.1 (0.9, 1.3) |
| Continuous (per SD=121)                       |      |                        |                |                |                |
| <b>Visceral fat</b>                           | 2489 | 434                    | 1.2 (1.1, 1.4) | 1.2 (1.1, 1.4) | 1.1 (1.0, 1.3) |
| Continuous (per SD=67)                        |      |                        |                |                |                |
| <b>R Thigh Intermuscular Fat Area (cm-sq)</b> | 2489 | 434                    | 1.1 (1.0, 1.3) | 1.1 (1.0, 1.2) | 1.0 (0.9, 1.2) |
| Continuous (per SD=6.8)                       |      |                        |                |                |                |
| BMI and WC in the same model                  |      |                        |                |                |                |
| <b>Waist Circumference</b>                    | 2489 | 434                    | 1.2 (1.1, 1.5) | 1.2 (1.0, 1.4) | 1.2 (1.0, 1.4) |
| Continuous (per SD=12.5)                      |      |                        |                |                |                |
| <b>BMI</b>                                    | 2489 | 434                    | 1.1 (0.9, 1.3) | 1.1 (1.0, 1.4) | 1.1 (0.9, 1.3) |
| Continuous (per SD=4.6)                       |      |                        |                |                |                |

\*Adjusted for age, sex, race and site

\*\*further adjusted for DM, SBP, HTN meds, ACR , smoking, LDL cholesterol, HDL cholesterol, oral estrogen, prevalent CHD, prevalent HF, and CRP.

Supplemental material is neither peer-reviewed nor thoroughly edited by CJASN. The authors alone are responsible for the accuracy and presentation of the material.

**Table 3. Association of measures of obesity with incident CKD defined by eGFR cystatin C using multiple predictors in the same model**

|                                               | <b>Unadjusted</b>   | <b>Model 1*</b>     | <b>Model 2**</b>    |
|-----------------------------------------------|---------------------|---------------------|---------------------|
| VAT, SAT and IMAT in the same model           | <b>IRR (95% CI)</b> | <b>IRR (95% CI)</b> | <b>IRR (95% CI)</b> |
| <b>Subcutaneous fat</b>                       | 1.1 (0.9, 1.2)      | 1.0 (0.9, 1.1)      | 1.0 (0.9, 1.1)      |
| Continuous (per SD=121)                       |                     |                     |                     |
| <b>Visceral fat</b>                           | 1.3 (1.2, 1.4)      | 1.2 (1.1, 1.3)      | 1.2 (1.1, 1.3)      |
| Continuous (per SD=67)                        |                     |                     |                     |
| <b>R Thigh Intermuscular Fat Area (cm-sq)</b> | 1.1 (1.0, 1.2)      | 1.1 (1.0, 1.2)      | 1.0 (0.9, 1.1)      |
| Continuous (per SD=6.8)                       |                     |                     |                     |
| BMI and WC in the same model                  |                     |                     |                     |
| <b>Waist Circumference</b>                    | 1.2 (1.1, 1.3)      | 1.2 (1.0, 1.3)      | 1.1 (1.0, 1.3)      |
| Continuous (per SD=12.5)                      |                     |                     |                     |
| <b>BMI</b>                                    | 1.1 (1.0, 1.3)      | 1.1 (0.9, 1.3)      | 1.1 (0.9, 1.2)      |

\*Adjusted for age, sex, race and site \*\*further adjusted for DM, SBP, HTN meds, ACR, smoking, LDL cholesterol, HDL cholesterol, oral estrogen, prevalent CHD, prevalent HF, and CRP.

Supplemental material is neither peer-reviewed nor thoroughly edited by CJASN. The authors alone are responsible for the accuracy and presentation of the material.

**Table 4. Association of measures of adiposity with kidney function decline defined as cystatin C eGFR >40%**

|                                               | N    | $\Delta$ eGFR>40% | Unadjusted<br>OR (95% CI) | Model 1*<br>OR (95% CI) | Model 2**<br>OR (95% CI) |
|-----------------------------------------------|------|-------------------|---------------------------|-------------------------|--------------------------|
| <b>Subcutaneous fat</b>                       |      |                   |                           |                         |                          |
| Continuous (per SD=121)                       | 2489 | 210               | 1.2 (1.0, 1.3)            | 1.3 (1.1, 1.5)          | 1.2 (1.0, 1.4)           |
| Quartiles                                     |      |                   |                           |                         |                          |
| < 196                                         | 621  | 54                | 1. (ref)                  | 1.0 (ref)               | 1.0 (ref)                |
| 196 -- 267                                    | 619  | 42                | 0.7 (0.5, 1.1)            | 0.8 (0.5, 1.2)          | 0.7 (0.5, 1.1)           |
| 268 -- 357                                    | 633  | 53                | 0.9 (0.6, 1.4)            | 1.1 (0.7, 1.6)          | 1.0 (0.6, 1.5)           |
| > 357                                         | 616  | 61                | 1.1 (0.8, 1.7)            | 1.4 (0.9, 2.1)          | 1.1 (0.7, 1.7)           |
| <b>Visceral fat</b>                           |      |                   |                           |                         |                          |
| Continuous (per SD=67)                        | 2489 | 210               | 1.2 (1.1, 1.4)            | 1.2 (1.1, 1.4)          | 1.1 (0.9, 1.2)           |
| Quartiles                                     |      |                   |                           |                         |                          |
| < 94                                          | 618  | 43                | 1.0 (ref)                 | 1.0 (ref)               | 1.0 (ref)                |
| 94 – 132                                      | 626  | 45                | 1.0 (0.7, 1.6)            | 1.1 (0.7, 1.7)          | 1.0 (0.6, 1.5)           |
| 133 – 181                                     | 625  | 59                | 1.4 (0.9, 2.2)            | 1.5 (1.0, 2.2)          | 1.2 (0.8, 1.9)           |
| > 181                                         | 620  | 63                | 1.6(1.0, 2.3)             | 1.6 (1.1, 2.5)          | 1.1 (0.7, 1.7)           |
| <b>R Thigh Intermuscular Fat Area (cm-sq)</b> |      |                   |                           |                         |                          |
| Continuous (per SD=6.8)                       | 2481 | 208               | 1.3 (1.1, 1.4)            | 1.3 (1.1, 1.4)          | 1.1 (1.0, 1.3)           |
| Quartiles                                     |      |                   |                           |                         |                          |
| < 6.15                                        | 631  | 32                | 1.0 (ref)                 | 1.0 (ref)               | 1.0 (ref)                |
| 6.15 – 9.01                                   | 641  | 52                | 1.7 (1.1, 2.7)            | 1.7 (1.1, 2.7)          | 1.7 (1.1, 2.8)           |
| 9.02 – 13.12                                  | 620  | 59                | 2.0 (1.3, 3.2)            | 2.1 (1.3, 3.3)          | 1.8 (1.12, 2.9)          |
| > 13.12                                       | 589  | 65                | 2.4 (1.5, 3.7)            | 2.4 (1.5, 3.8)          | 1.8 (1.1, 3.0)           |
| <b>Waist Circumference</b>                    |      |                   |                           |                         |                          |
| Continuous (per SD=12.5)                      | 2488 | 210               | 1.3 (1.2, 1.5)            | 1.3 (1.2, 1.5)          | 1.2 (1.0, 1.4)           |
| Quartiles                                     |      |                   |                           |                         |                          |
| < 91.7                                        | 616  | 35                | 1.0 (ref)                 | 1.0 (ref)               | 1.0 (ref)                |
| 91.7 – 99.2                                   | 645  | 54                | 1.5 (0.9, 2.3)            | 1.5(0.9, 2.3)           | 1.5 (0.9, 2.3)           |
| 99.3 – 107.1                                  | 631  | 56                | 1.6 (1.1, 2.5)            | 1.6 (1.0, 2.5)          | 1.5 (0.9, 2.4)           |
| > 107.1                                       | 596  | 65                | 2.0 (1.3, 3.1)            | 2.0 (1.3, 3.1)          | 1.5 (0.9, 2.4)           |
| <b>BMI</b>                                    |      |                   |                           |                         |                          |
| Continuous (per SD=4.6)                       | 2489 | 210               | 1.3 (1.1, 1.5)            | 1.3 (1.1, 1.5)          | 1.2(1.0, 1.4)            |
| Quartiles                                     |      |                   |                           |                         |                          |
| < 24.1                                        | 615  | 39                | 1.0 (ref)                 | 1.0 (ref)               | 1.0 (ref)                |
| 24.1 – 26.8                                   | 641  | 44                | 1.2 (0.7, 1.8)            | 1.1 (0.7, 1.8)          | 1.2 (0.7, 1.9)           |
| 26.9 – 30.0                                   | 638  | 61                | 1.7 (1.1, 2.6)            | 1.6 (1.1, 2.5)          | 1.4 (0.9, 2.2)           |
| > 30.1                                        | 595  | 66                | 1.9 (1.2, 2.9)            | 1.9 (1.2, 2.9)          | 1.5 (0.9, 2.3)           |

*Supplemental material is neither peer-reviewed nor thoroughly edited by CJASN. The authors alone are responsible for the accuracy and presentation of the material.*

\*Adjusted for age, sex, race and site

\*\*further adjusted for DM, SBP, HTN meds, ACR , smoking, LDL cholesterol, HDL cholesterol, oral estrogen, prevalent CHD, prevalent HF, and CRP. Kidney function decline was defined as eGFR\_cysC decline > 40%

Supplemental material is neither peer-reviewed nor thoroughly edited by CJASN. The authors alone are responsible for the accuracy and presentation of the material.

**Table 5. Association of BMI by WHO criteria with kidney function decline defined by GFR\_cysC decline > 30%**

|                | N    | $\Delta eGFR > 30\%$ | Unadjusted<br>OR (95% CI) | Model 1*<br>OR (95% CI) | Model 2**<br>OR (95% CI) |
|----------------|------|----------------------|---------------------------|-------------------------|--------------------------|
| <b>BMI</b>     |      |                      |                           |                         |                          |
| WHO cut-points |      |                      |                           |                         |                          |
| < 18.50        | 26   | 2                    | 0.5 (0.1, 2.1)            | 0.5 (0.1, 2.1)          | 0.6 (0.1, 2.5)           |
| 18.50 – 24.99  | 769  | 113                  | 1.0 (ref)                 | 1.0 (ref)               | 1.0 (ref)                |
| 25.00 – 29.99  | 1087 | 181                  | 1.2 (0.9, 1.5)            | 1.2 (0.9, 1.5)          | 1.1 (0.9, 1.5)           |
| $\geq 30.00$   | 607  | 138                  | 1.7 (1.3, 2.2)            | 1.7 (1.3, 2.3)          | 1.4 (1.1, 2.0)           |

\*Adjusted for age, gender, race and site

\*\*further adjusted for DM, SBP, HTN meds, ACR, smoking, LDL cholesterol, HDL cholesterol, oral estrogen, prevalent CHD, prevalent HF, and CRP

Supplemental material is neither peer-reviewed nor thoroughly edited by CJASN. The authors alone are responsible for the accuracy and presentation of the material.

**Table 6. A association of BMI defined by WHO criteria with incident CKD**

|                | N    | Inc<br>CKD | Rate<br>(%/yr) | Unadjusted<br>IRR (95% CI) | Model 1*<br>IRR (95% CI) | Model 2**<br>IRR (95% CI) |
|----------------|------|------------|----------------|----------------------------|--------------------------|---------------------------|
| <b>BMI</b>     |      |            |                |                            |                          |                           |
| WHO cut-points |      |            |                |                            |                          |                           |
| < 18.50        | 25   | 2          | 1.3            | 0.6 (0.2, 2.5)             | 0.7 (0.2, 2.4)           | 0.7 (0.2, 2.6)            |
| 18.50 – 24.99  | 718  | 95         | 2.1            | 1.0 (ref)                  | 1.0 (ref)                | 1.0 (ref)                 |
| 25.00 – 29.99  | 1008 | 165        | 2.6            | 1.3 (1.9, 1.6)             | 1.1 (0.9, 1.4)           | 1.1 (0.9, 1.4)            |
| ≥ 30.00        | 544  | 130        | 4.1            | 1.9 (1.5, 2.5)             | 1.6 (1.2, 2.0)           | 1.4 (1.10 1.9)            |

\*Adjusted for age, gender, race, site and baseline eGFR

\*\*further adjusted for DM, SBP, HTN meds, ACR, smoking, LDL cholesterol, HDL cholesterol, oral estrogen, prevalent CHD, prevalent HF and CRP.
